# Supplementary material for: An easily fabricated palladium nanocatalyst on magnetic biochar for Suzuki–Miyaura and aryl halide cyanation reactions
Source: Royal Society of Chemistry journal article supplement (doi:10.1039/d1nj00941a), 2021-01-01
Supplement: d1nj00941a1.pdf [file d1nj00941a1.pdf]

### SUPPLEMENTARY DATA

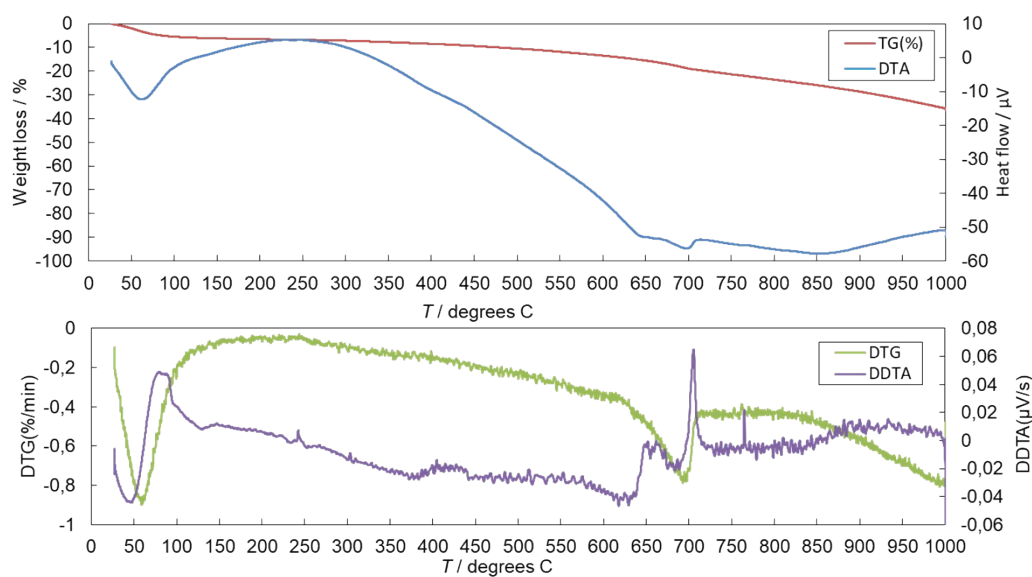

**Figure S1.** Thermogravimetric and differential thermal analysis of PTB

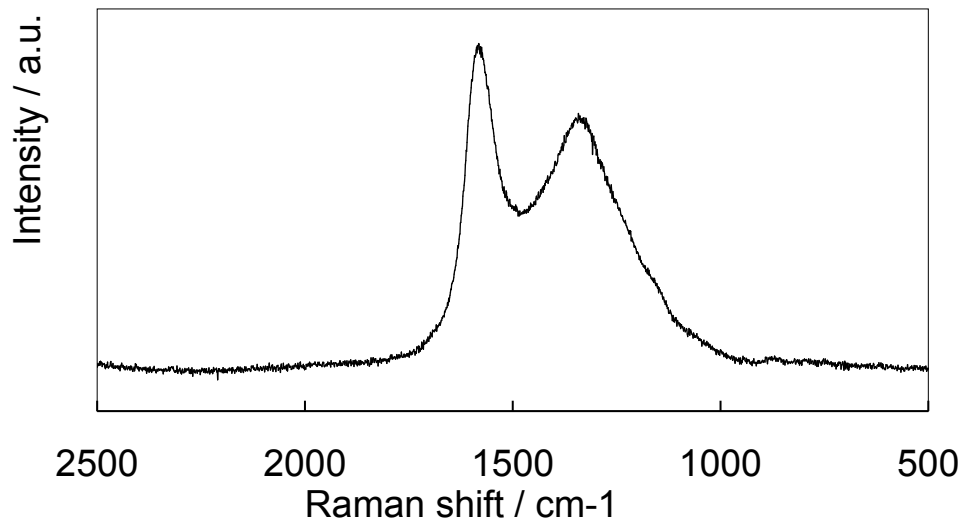

**Figure S2.** Raman spectrum of PTB

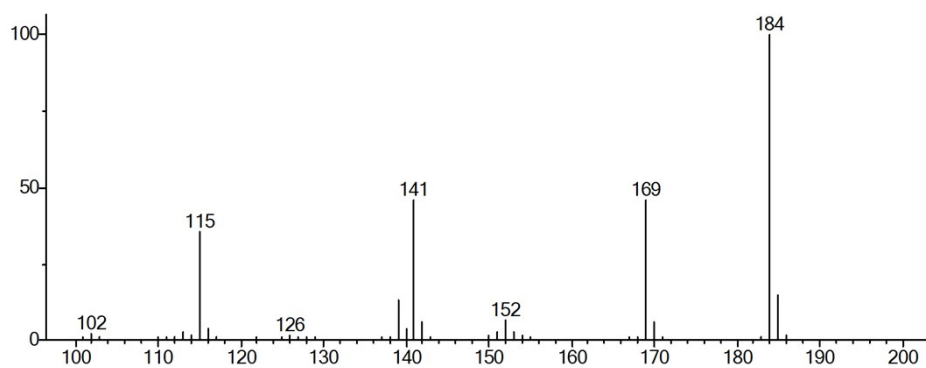

**Fig. S3.** GC-MS spectrum of p-methoxy-biphenyl (Entry 1 and 5 in Table 3)

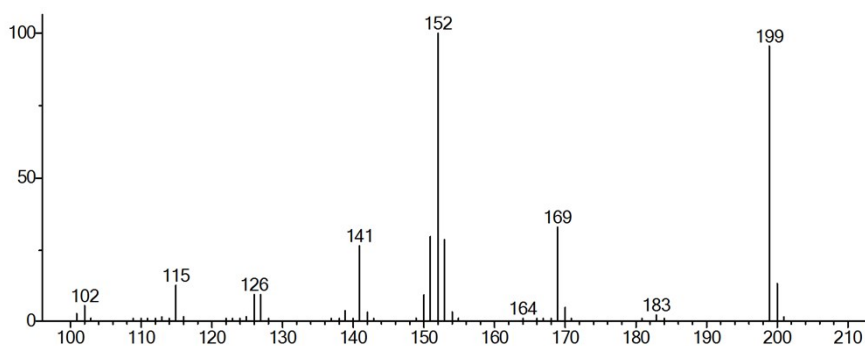

**Fig. S4.** GC-MS spectrum of p-nitro biphenyl (Entry 2 and 6 in Table 3)

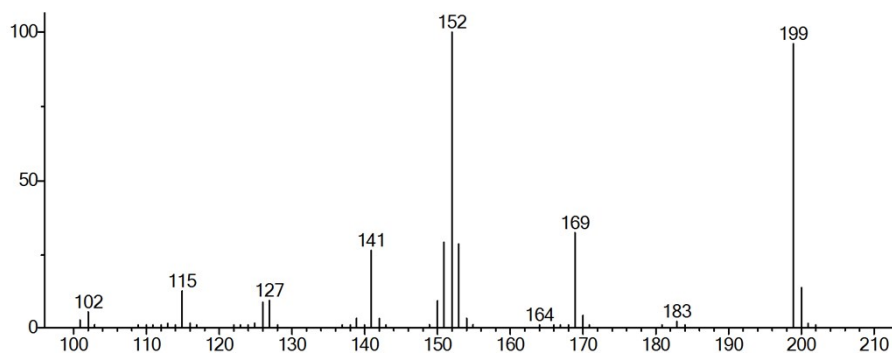

**Fig. S5.** GC-MS spectrum of m-nitro biphenyl (Entry 3 and 8 in Table 3)

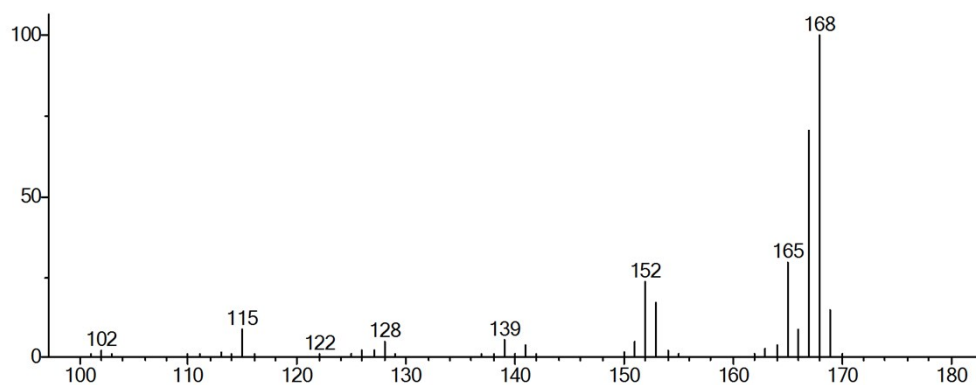

**Fig. S6.** GC-MS spectrum of p-methyl biphenyl (Entry 4 and 9 in Table 3)

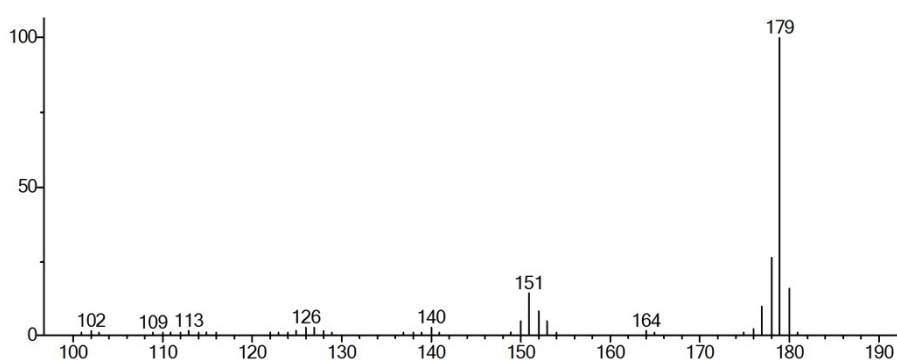

**Fig. S7.** GC-MS spectrum of p-cyanobiphenyl (Entry 8 in Table 3)

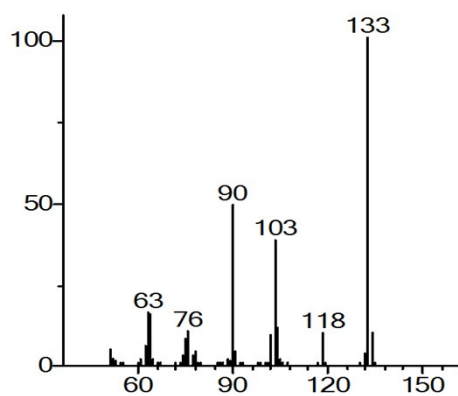

**Fig. S8.** GC-MS spectrum of p-methoxybenzotrile (Entry 1 and 5 in Table 5)

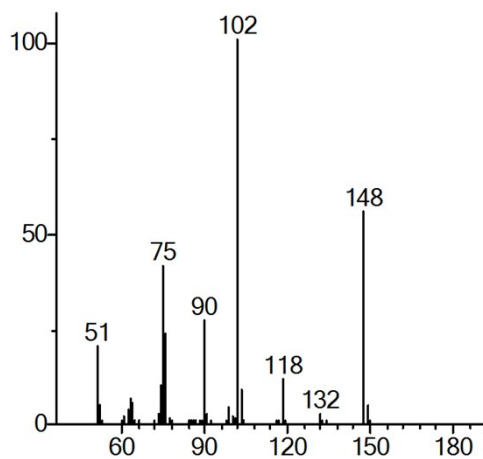

**Fig. S9.** GC-MS spectrum of p-nitrobenzotrile (Entry 2 and 6 in Table 6)

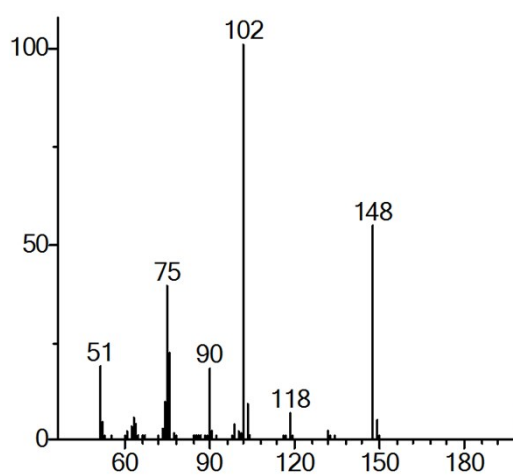

**Fig. S10.** GC-MS spectrum of m-nitrobenzotrile (Entry 3 and 8 in Table 6)

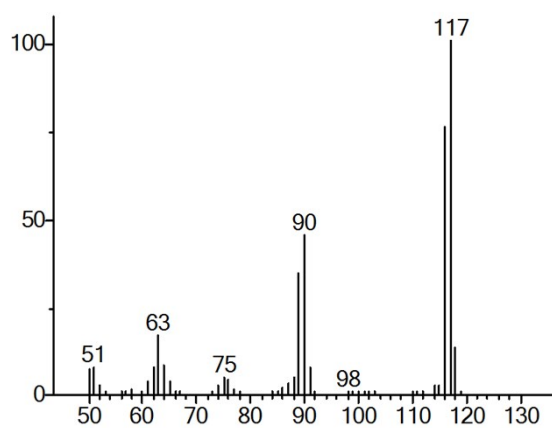

**Fig. S11.** GC-MS spectrum of p-tolunitrile (Entry 4 and 9 in Table 5)

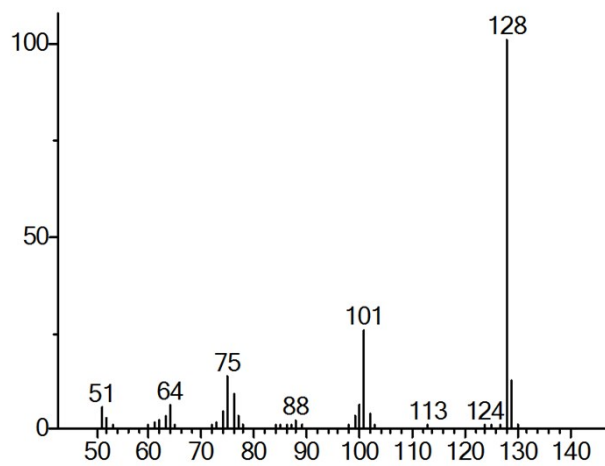

**Fig. S12.** GC-MS spectrum of terephthalonitrile (Entry 7 in Table 5)
